# Supplementary material for: Nanosilver impacts on aquatic microbial decomposers and litter decomposition assessed as pollution-induced community tolerance (PICT)
Source: Royal Society of Chemistry journal article supplement (doi:10.1039/d0en00375a), 2020-01-01
Supplement: d0en00375a1.pdf [file d0en00375a1.pdf]

**Nanosilver impacts on aquatic microbial decomposers and litter decomposition  
assessed as pollution-induced community tolerance (PICT)**

Daniela Batista<sup>1,2</sup>, Ahmed Tlili<sup>3,4</sup>, Mark O. Gessner<sup>3,5</sup>, Cláudia Pascoal<sup>1,2</sup>, and Fernanda Cássio<sup>1,2</sup>

<sup>1</sup>Centre of Molecular and Environmental Biology (CBMA), Department of Biology, University of Minho, Campus de Gualtar, 4710-057 Braga, Portugal.

<sup>2</sup>Institute of Science and Innovation for Biosustainability (IB-S), University of Minho, Campus de Gualtar, 4710-057 Braga, Portugal.

<sup>3</sup>Department of Experimental Limnology, Leibniz Institute of Freshwater Ecology and Inland Fisheries (IGB), Alte Fischerhütte 2, 16775 Stechlin, Germany.

<sup>4</sup>Department of Environmental Toxicology, Swiss Federal Institute of Aquatic Science and Technology (Eawag), Dübendorf, Switzerland.

<sup>5</sup>Department of Ecology, Berlin Institute of Ecology (TU Berlin), Ernst-Reuter-Platz 1, 10587 Berlin, Germany.

E-mail contact: [danimbatista@gmail.com](mailto:danimbatista@gmail.com) / [danimbatista@bio.uminho.pt](mailto:danimbatista@bio.uminho.pt)

This Supplementary Information section is 8 pages long and contains five supplemental tables and one supplemental figure.

## SUPPORTING INFORMATION

**Table S1** - Physical and chemical characteristics of stream water collected in mid-September at Kleine Lonau, a third-order softwater stream in the Harz Mountains, Germany, where leaf litter was deployed for microbial colonization.

| <b>Parameter</b>                                      | <b>Value</b> |
|-------------------------------------------------------|--------------|
| pH                                                    | 7.2          |
| O <sub>2</sub> (mg L <sup>-1</sup> )                  | 8.8          |
| NO <sub>3</sub> <sup>-</sup> (mg N L <sup>-1</sup> )  | 0.67         |
| NO <sub>2</sub> <sup>-</sup> (μg N L <sup>-1</sup> )  | 2            |
| NH <sub>4</sub> <sup>+</sup> (μg N L <sup>-1</sup> )  | 22           |
| PO <sub>4</sub> <sup>3-</sup> (μg P L <sup>-1</sup> ) | 5            |

**Table S2** - Physical and chemical characteristics of water collected from microcosms when renewing medium every 5<sup>th</sup> day for 25 days of exposure to AgNPs (NP) or AgNO<sub>3</sub> (Ag<sup>+</sup>).

| Treatment<br>( $\mu\text{g L}^{-1}$ ) | Day | N-NO <sub>2</sub> <sup>-</sup><br>(mg L <sup>-1</sup> ) | N-NO <sub>3</sub> <sup>-</sup><br>(mg L <sup>-1</sup> ) | N-NH <sub>4</sub> <sup>+</sup><br>(mg L <sup>-1</sup> ) | TN<br>(mg L <sup>-1</sup> ) | SRP<br>(mg L <sup>-1</sup> ) | TP<br>(mg L <sup>-1</sup> ) | DOC<br>(mg L <sup>-1</sup> ) | Oxygen<br>(mg L <sup>-1</sup> ) | pH   |
|---------------------------------------|-----|---------------------------------------------------------|---------------------------------------------------------|---------------------------------------------------------|-----------------------------|------------------------------|-----------------------------|------------------------------|---------------------------------|------|
| <b>0</b>                              | 0   | 0.015                                                   | 0.020                                                   | 0.057                                                   | 1.87                        | 0.022                        | 0.129                       | 54.3                         | 6.5                             | 5.95 |
| <b>50 NP</b>                          |     | 0.000                                                   | 0.014                                                   | 0.052                                                   | 1.91                        | 0.012                        | 0.105                       | 52.9                         | 6.7                             | 6.14 |
| <b>100 NP</b>                         |     | 0.000                                                   | 0.014                                                   | 0.045                                                   | 1.55                        | 0.013                        | 0.059                       | 55.5                         | 6.4                             | 6.52 |
| <b>200 NP</b>                         |     | 0.000                                                   | 0.013                                                   | 0.041                                                   | 1.98                        | 0.010                        | 0.060                       | 54.2                         | 6.2                             | 6.55 |
| <b>20 Ag<sup>+</sup></b>              |     | 0.000                                                   | 0.000                                                   | 0.045                                                   | 1.33                        | 0.014                        | 0.050                       | 51.4                         | 5.7                             | 6.65 |
| <b>0</b>                              | 5   | 0.005                                                   | 0.006                                                   | 0.020                                                   | 1.16                        | 0.013                        | 0.064                       | 19.2                         | 7.9                             | 6.49 |
| <b>50 NP</b>                          |     | 0.005                                                   | 0.006                                                   | 0.021                                                   | 1.38                        | 0.015                        | 0.080                       | 19.3                         | 8.1                             | 6.62 |
| <b>100 NP</b>                         |     | 0.005                                                   | 0.006                                                   | 0.022                                                   | 1.29                        | 0.017                        | 0.091                       | 19.8                         | 7.8                             | 6.66 |
| <b>200 NP</b>                         |     | 0.006                                                   | 0.009                                                   | 0.049                                                   | 1.26                        | 0.018                        | 0.101                       | 20.5                         | 7.7                             | 6.69 |
| <b>20 Ag<sup>+</sup></b>              |     | 0.005                                                   | 0.006                                                   | 0.021                                                   | 1.18                        | 0.016                        | 0.077                       | 17.4                         | 8.0                             | 6.67 |
| <b>0</b>                              | 10  | 0.004                                                   | 0.011                                                   | 0.044                                                   | 0.97                        | 0.011                        | 0.063                       | 14.2                         | 7.9                             | 6.49 |
| <b>50 NP</b>                          |     | 0.003                                                   | 0.005                                                   | 0.042                                                   | 1.07                        | 0.012                        | 0.069                       | 15.6                         | 8.1                             | 6.62 |
| <b>100 NP</b>                         |     | 0.004                                                   | 0.011                                                   | 0.052                                                   | 1.30                        | 0.011                        | 0.068                       | 15.5                         | 7.8                             | 6.66 |
| <b>200 NP</b>                         |     | 0.004                                                   | 0.013                                                   | 0.056                                                   | 1.11                        | 0.013                        | 0.075                       | 16.3                         | 7.7                             | 6.69 |
| <b>20 Ag<sup>+</sup></b>              |     | 0.005                                                   | 0.203                                                   | 0.047                                                   | 0.96                        | 0.011                        | 0.080                       | 14.2                         | 8.0                             | 6.67 |
| <b>0</b>                              | 15  | 0.004                                                   | 0.007                                                   | 0.046                                                   | 1.44                        | 0.012                        | 0.060                       | 13.6                         | 7.4                             | 6.60 |
| <b>50 NP</b>                          |     | 0.004                                                   | 0.012                                                   | 0.042                                                   | 1.01                        | 0.012                        | 0.061                       | 14.0                         | 7.4                             | 6.56 |
| <b>100 NP</b>                         |     | 0.004                                                   | 0.004                                                   | 0.028                                                   | 0.98                        | 0.011                        | 0.066                       | 13.3                         | 8.4                             | 6.62 |
| <b>200 NP</b>                         |     | 0.004                                                   | 0.035                                                   | 0.068                                                   | 1.07                        | 0.013                        | 0.065                       | 14.4                         | 7.5                             | 6.67 |
| <b>20 Ag<sup>+</sup></b>              |     | 0.004                                                   | 0.035                                                   | 0.022                                                   | 1.01                        | 0.011                        | 0.071                       | 13.1                         | 8.0                             | 6.79 |
| <b>0</b>                              | 20  | 0.003                                                   | 0.016                                                   | 0.042                                                   | 0.83                        | 0.010                        | 0.077                       | 13.5                         | 7.5                             | 6.52 |

|                          |    |       |       |       |      |       |       |      |     |      |
|--------------------------|----|-------|-------|-------|------|-------|-------|------|-----|------|
| <b>50 NP</b>             |    | 0.003 | 0.024 | 0.025 | 0.75 | 0.008 | 0.051 | 14.3 | 6.8 | 6.58 |
| <b>100 NP</b>            |    | 0.003 | 0.271 | 0.076 | 0.76 | 0.010 | 0.079 | 13.5 | 7.5 | 6.64 |
| <b>200 NP</b>            |    | 0.004 | 0.017 | 0.041 | 0.76 | 0.007 | 0.060 | 14.0 | 6.8 | 6.66 |
| <b>20 Ag<sup>+</sup></b> |    | 0.003 | 0.017 | 0.033 | 0.82 | 0.012 | 0.084 | 15.6 | 7.5 | 6.73 |
| <b>0</b>                 | 25 | 0.006 | 0.026 | 0.196 | 2.47 | 0.006 | 0.181 | 11.3 | 7.3 | 7.38 |
| <b>50 NP</b>             |    | 0.013 | 0.208 | 0.112 | 2.13 | 0.006 | 0.176 | 14.4 | 7.0 | 7.35 |
| <b>100 NP</b>            |    | 0.010 | 0.149 | 0.106 | 1.80 | 0.009 | 0.131 | 15.2 | 7.5 | 7.35 |
| <b>200 NP</b>            |    | 0.012 | 0.305 | 0.051 | 1.41 | 0.005 | 0.039 | 32.9 | 7.4 | 7.36 |
| <b>20 Ag<sup>+</sup></b> |    | 0.009 | 0.130 | 0.042 | 1.44 | 0.007 | 0.069 | 40.8 | 7.0 | 7.37 |

**Table S3** - Percent contribution of fungal taxa to total conidial production on leaves in the inoculum and after exposure for 25 days in microcosms to AgNPs (NP) at different concentrations ( $\mu\text{g L}^{-1}$ ) or to  $\text{AgNO}_3$  ( $\text{Ag}^+$ ,  $\mu\text{g L}^{-1}$ ). -, not detected

| <b>Fungal taxon</b>              | <b>Inoculum</b> | <b>0</b> | <b>50 NP</b> | <b>100 NP</b> | <b>200 NP</b> | <b>20 <math>\text{Ag}^+</math></b> |
|----------------------------------|-----------------|----------|--------------|---------------|---------------|------------------------------------|
| <i>Alatospora acuminata</i>      | 0.43            | -        | 0.87         | 0.70          | 1.03          | 0.99                               |
| <i>Alatospora pulchella</i>      | -               | 0.26     | -            | -             | -             | 0.25                               |
| <i>Anguillospora crassa</i>      | 0.36            | -        | -            | -             | -             | -                                  |
| <i>Anguillospora filiformis</i>  | 0.21            | 0.43     | -            | -             | -             | -                                  |
| <i>Articulospora tetracladia</i> | 0.78            | 2.09     | 2.83         | 3.95          | 4.62          | 9.16                               |
| <i>Clavariopsis aquatica</i>     | 0.92            | -        | 0.89         | 3.74          | 5.26          | 1.30                               |
| <i>Cylindrocarpon</i> sp.        | 0.14            | 0.28     | 0.20         | -             | 0.36          | 0.24                               |
| <i>Dimorphospora foliicola</i>   | 0.85            | -        | -            | -             | -             | -                                  |
| <i>Flagellospora curvula</i>     | 70.2            | 80.9     | 86.5         | 84.3          | 77.6          | 77.1                               |
| <i>Fusarium</i> sp.              | 0.71            | -        | -            | -             | -             | -                                  |
| <i>Heliscus lugdunensis</i>      | 1.14            | -        | 0.28         | 0.19          | 0.21          | 0.23                               |
| <i>Lemonniera aquatica</i>       | 0.28            | 0.53     | 0.10         | 0.30          | 0.10          | 0.76                               |
| <i>Tetrachaetum elegans</i>      | 23.5            | 5.52     | 1.64         | 4.49          | 3.17          | 2.92                               |
| <i>Tetracladium marchalianum</i> | 0.36            | 9.98     | 6.65         | 2.40          | 5.67          | 7.04                               |
| <i>Tricladium chaetocladium</i>  | 0.14            | -        | -            | -             | -             | -                                  |
| Total no. of species             | 14              | 8        | 9            | 8             | 9             | 10                                 |

**Table S4** - ANOVA results from the effects of AgNPs or ionic Ag on leaf mass loss, fungal sporulation rate, ergosterol concentration, bacterial production, bacterial abundance, microbial respiration and LAP activity on decomposing leaves (one-way ANOVA). Effect size was calculated between groups, where  $\eta^2$  (Eta squared) = Treatment

| <b>RESPONSE VARIABLE</b>        | <b>SOURCE OF VARIATION</b> | <b>SS</b>             | <b>DF</b> | <b>MS</b>          | <b>F</b> | <b>P</b> | <b>Effect size (%)</b> |
|---------------------------------|----------------------------|-----------------------|-----------|--------------------|----------|----------|------------------------|
| <b>Leaf mass loss</b>           | Treatment                  | 244.6                 | 4         | 61.15              | 2.85     | 0.061    | 43.2                   |
|                                 | Residual                   | 322.0                 | 15        | 21.47              |          |          |                        |
|                                 | Total                      | 566.7                 | 19        |                    |          |          |                        |
| <b>Fungal Sporulation rate</b>  | Treatment                  | 5.53x10 <sup>10</sup> | 4         | 1x10 <sup>10</sup> | 13.72    | <0.0001  | 78.5                   |
|                                 | Residual                   | 1.51x10 <sup>10</sup> | 15        | 1x10 <sup>9</sup>  |          |          |                        |
|                                 | Total                      | 7.04x10 <sup>10</sup> | 19        |                    |          |          |                        |
| <b>Ergosterol concentration</b> | Treatment                  | 34242                 | 4         | 8561.0             | 10.71    | 0.0003   | 74.1                   |
|                                 | Residual                   | 11991                 | 15        | 799.4              |          |          |                        |
|                                 | Total                      | 46233                 | 19        |                    |          |          |                        |
| <b>Bacterial production</b>     | Treatment                  | 3.482                 | 4         | 0.8705             | 4.22     | 0.017    | 52.9                   |
|                                 | Residual                   | 3.093                 | 15        | 0.2062             |          |          |                        |
|                                 | Total                      | 6.575                 | 19        |                    |          |          |                        |
| <b>Bacterial abundance</b>      | Treatment                  | 4.77x10 <sup>21</sup> | 4         | 1x10 <sup>21</sup> | 8.29     | 0.001    | 68.9                   |
|                                 | Residual                   | 2.16x10 <sup>21</sup> | 15        | 1x10 <sup>20</sup> |          |          |                        |
|                                 | Total                      | 6.92x10 <sup>21</sup> | 19        |                    |          |          |                        |
| <b>Microbial respiration</b>    | Treatment                  | 73988                 | 4         | 18497              | 7.05     | 0.002    | 65.3                   |
|                                 | Residual                   | 39352                 | 15        | 2623               |          |          |                        |
|                                 | Total                      | 113340                | 19        |                    |          |          |                        |
| <b>LAP activity</b>             | Treatment                  | 22.62                 | 4         | 5.656              | 1.67     | 0.209    | 30.1                   |
|                                 | Residual                   | 50.92                 | 15        | 3.395              |          |          |                        |
|                                 | Total                      | 73.55                 | 19        |                    |          |          |                        |

Sum of Squares/Total Sum of Squares.

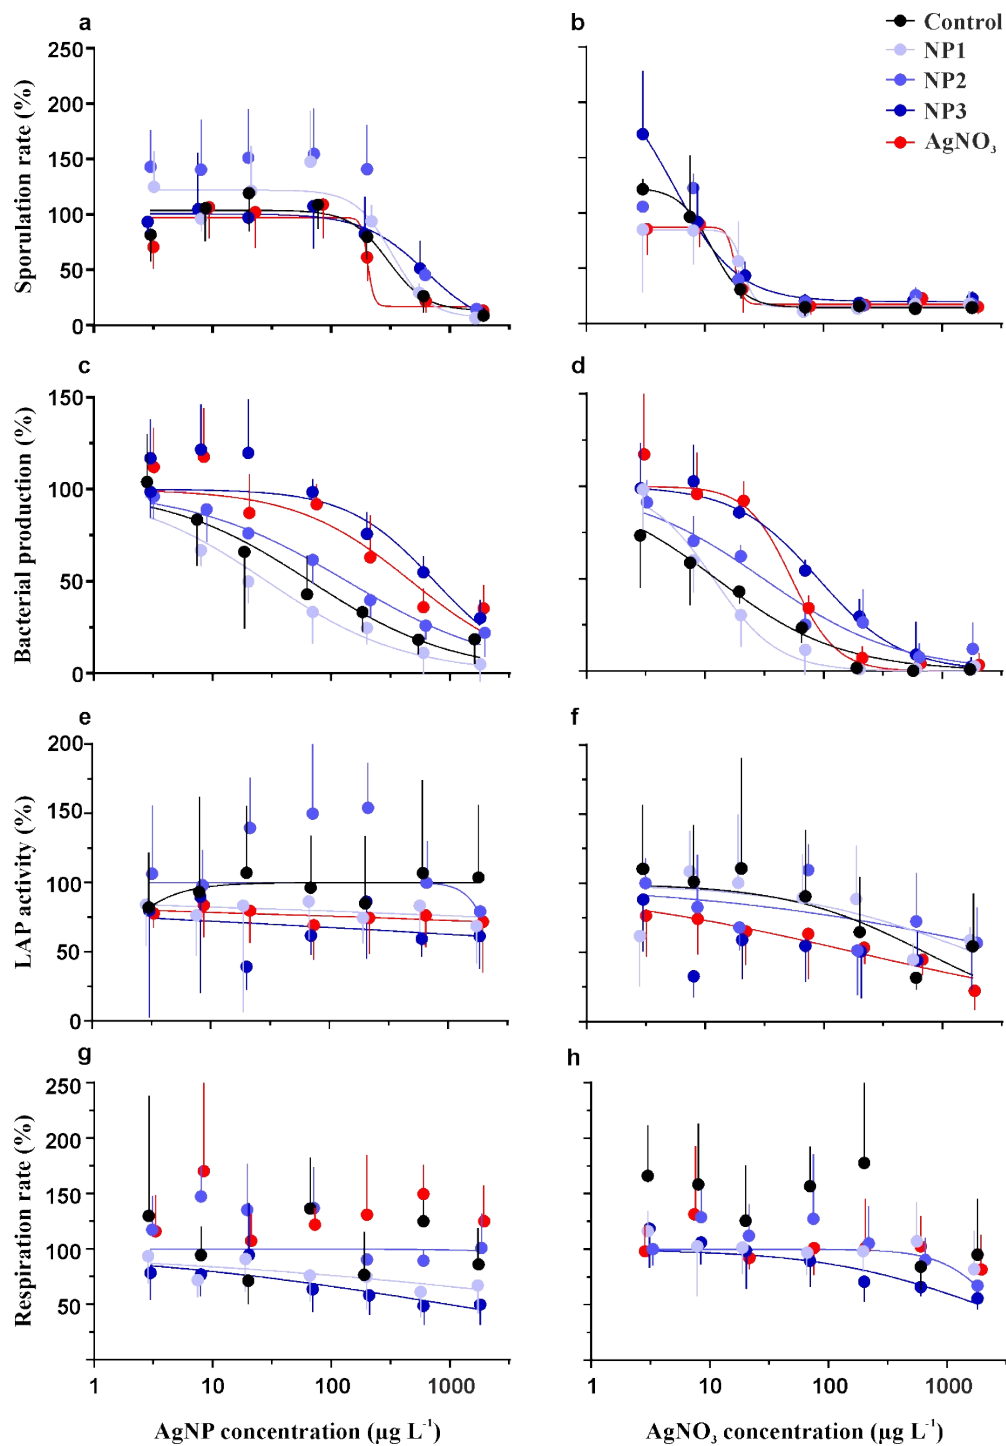

**Figure S1** - Dose-response curves for short-term exposure (12 h) to AgNPs (a, c, e, g) or AgNO<sub>3</sub> (b, d, f, h), showing responses of fungal sporulation (a, b), bacterial production (c, d), enzyme activity (e, f) and microbial respiration (g, h) associated with decomposing leaf litter in microcosms. Control = 0 µg L<sup>-1</sup>, NP1 = 50 µg L<sup>-1</sup>; NP2 = 100 µg L<sup>-1</sup>; NP3 = 200 µg L<sup>-1</sup>, and AgNO<sub>3</sub> = 20 µg L<sup>-1</sup>.

**Table S5** – R<sup>2</sup> values for the fit of each dose-response curve for bacterial production, fungal sporulation rate and potential LAP activity in control communities and pre-exposed communities to AgNP (NP1 = 50 µg L<sup>-1</sup>; NP2 = 100 µg L<sup>-1</sup>; NP3 = 200 µg L<sup>-1</sup>) or AgNO<sub>3</sub> (20 µg L<sup>-1</sup>), obtained via in short-term bioassays with increasing concentrations of AgNP or AgNO<sub>3</sub>.

| <b>Communities</b>      | <b>Bacterial production</b> |                   | <b>Sporulation rate</b> |                   | <b>Potential LAP activity</b> |                   |
|-------------------------|-----------------------------|-------------------|-------------------------|-------------------|-------------------------------|-------------------|
|                         | AgNPs                       | AgNO <sub>3</sub> | AgNPs                   | AgNO <sub>3</sub> | AgNPs                         | AgNO <sub>3</sub> |
| <b>Control</b>          | 0.66                        | 0.82              | 0.73                    | 0.83              | -                             | 0.30              |
| <b>NP1</b>              | 0.85                        | 0.88              | 0.74                    | 0.61              | -                             | 0.23              |
| <b>NP2</b>              | 0.87                        | 0.86              | 0.75                    | 0.96              | -                             | 0.21              |
| <b>NP3</b>              | 0.68                        | 0.90              | 0.61                    | 0.85              | -                             | -                 |
| <b>AgNO<sub>3</sub></b> | 0.68                        | 0.84              | 0.69                    | 0.85              | -                             | 0.44              |
